# Supplementary material for: The Global Prevalence and Associated Factors of Burnout among Emergency Department Healthcare Workers and the Impact of the COVID-19 Pandemic: A Systematic Review and Meta-Analysis
Source: MDPI journal article supplement (doi:10.3390/healthcare11152220), 2023-08-07
Supplement: s1 [file s1]

**Supplementary Table 1.** The detailed search strategy employed in each of the searched databases

| No.                   | Search                                                                                                                                                                                                                                          | Results |
|-----------------------|-------------------------------------------------------------------------------------------------------------------------------------------------------------------------------------------------------------------------------------------------|---------|
| <b>PubMed</b>         |                                                                                                                                                                                                                                                 |         |
| #1                    | "emergency medicine" OR "emergency care" OR "emergency healthcare" OR "emergency nurses" OR "emergency physicians" OR "emergency medical technicians" OR "Emergency Medicine"[Mesh] OR "Emergency Medical Services"[Mesh]                       | 32,012  |
| #2                    | burnout OR depersonalization OR "personal accomplishment" OR "emotional exhaustion" OR "Burnout, Psychological"[Mesh]                                                                                                                           | 28,663  |
| #3                    | #1 AND #2                                                                                                                                                                                                                                       | 404     |
| <b>Scopus</b>         |                                                                                                                                                                                                                                                 |         |
| #1                    | TITLE-ABS-KEY("emergency medicine") OR TITLE-ABS-KEY("emergency care") OR TITLE-ABS-KEY("emergency healthcare") OR TITLE-ABS-KEY("emergency nurses") OR TITLE-ABS-KEY("emergency physicians") OR TITLE-ABS-KEY("emergency medical technicians") | 59,102  |
| #2                    | TITLE-ABS-KEY(burnout) OR TITLE-ABS-KEY(depersonalization) OR TITLE-ABS-KEY("personal accomplishment") OR TITLE-ABS-KEY("emotional exhaustion")                                                                                                 | 73,093  |
| #3                    | #1 AND #2                                                                                                                                                                                                                                       | 831     |
| <b>Web of Science</b> |                                                                                                                                                                                                                                                 |         |
| #1                    | ALL=("emergency medicine") OR ALL=("emergency care") OR ALL=("emergency healthcare") OR ALL=("emergency nurses") OR ALL=("emergency physicians") OR ALL=("emergency medical technicians")                                                       | 41,005  |
| #2                    | ALL=(burnout) OR ALL=(depersonalization) OR ALL=("personal accomplishment") OR ALL=("emotional exhaustion")                                                                                                                                     | 31,064  |
| #3                    | #1 AND #2                                                                                                                                                                                                                                       | 141     |
| <b>EMBASE</b>         |                                                                                                                                                                                                                                                 |         |
| #1                    | "emergency medicine":ab,ti,kw OR "emergency care":ab,ti,kw OR "emergency healthcare":ab,ti,kw OR "emergency nurses":ab,ti,kw OR "emergency physicians":ab,ti,kw OR "emergency medical technicians":ab,ti,kw                                     | 33,049  |
| #2                    | emergency medicine'/exp                                                                                                                                                                                                                         | 59,983  |
| #3                    | #1 OR #2                                                                                                                                                                                                                                        | 55,395  |
| #4                    | burnout:ab,ti,kw OR depersonalization:ab,ti,kw OR "personal accomplishment":ab,ti,kw OR "emotional exhaustion":ab,ti,kw                                                                                                                         | 29,553  |
| #5                    | burnout'/exp                                                                                                                                                                                                                                    | 34,444  |
| #6                    | #4 OR #5                                                                                                                                                                                                                                        | 37,885  |
| #7                    | #3 AND #6                                                                                                                                                                                                                                       | 279     |
| <b>PsycINFO</b>       |                                                                                                                                                                                                                                                 |         |
| #1                    | "emergency medicine" OR "emergency care" OR "emergency healthcare" OR "emergency nurses" OR "emergency physicians" OR "emergency medical technicians"                                                                                           | 56,731  |
| #2                    | burnout OR depersonalization OR "personal accomplishment" OR "emotional exhaustion"                                                                                                                                                             | 91,932  |

|                                             |                                                                                                                                                                         |        |
|---------------------------------------------|-------------------------------------------------------------------------------------------------------------------------------------------------------------------------|--------|
| <b>#3</b>                                   | #1 AND #2                                                                                                                                                               | 119    |
| <b>EBSCOhost - Academic Search Complete</b> |                                                                                                                                                                         |        |
| <b>#1</b>                                   | AB "emergency medicine" OR AB "emergency care" OR AB "emergency healthcare" OR AB "emergency nurses" OR AB "emergency physicians" OR AB "emergency medical technicians" | 12,483 |
| <b>#2</b>                                   | AB burnout OR AB depersonalization OR AB "personal accomplishment" OR AB "emotional exhaustion"                                                                         | 17,739 |
| <b>#3</b>                                   | #1 AND #2                                                                                                                                                               | 77     |
| <b>Google Scholar</b>                       |                                                                                                                                                                         |        |
| <b>With all of the words</b>                | emergency burnout                                                                                                                                                       |        |
| <b>With the exact phrase</b>                |                                                                                                                                                                         |        |
| <b>With at least one of the words</b>       | burnout depersonalization "personal accomplishment" "emotional exhaustion"                                                                                              |        |
| <b>Total</b>                                | Only the first 200 records were selected                                                                                                                                | 200    |
