# Supplementary material for: The Global Prevalence and Associated Factors of Burnout among Emergency Department Healthcare Workers and the Impact of the COVID-19 Pandemic: A Systematic Review and Meta-Analysis
Source: Healthcare (Basel). 2023 Aug 7;11(15):2220. doi: 10.3390/healthcare11152220 (PMC10418606; doi:10.3390/healthcare11152220)
Supplement: Supplementary file 1 [file healthcare-11-02220-s001.zip]

Archive with 20 entries (20 files):
- Supp Fig 1.tiff
- Supp Fig 10.tiff
- Supp Fig 11.tiff
- Supp Fig 12.tiff
- Supp Fig 13.tiff
- Supp Fig 14.tiff
- Supp Fig 15.tiff
- Supp Fig 16.tiff
- Supp Fig 17.tiff
- Supp Fig 18.tiff
- Supp Fig 19.tiff
- Supp Fig 2.tiff
- Supp Fig 3.tiff
- Supp Fig 4.tiff
- Supp Fig 5.tiff
- Supp Fig 6.tiff
- Supp Fig 7.tiff
- Supp Fig 8.tiff
- Supp Fig 9.tiff
- Supplementary Table 1.pdf
